# Supplementary material for: Modeling the roles of rigidity and dopants in single-atom methane-to-methanol catalysts
Source: Royal Society of Chemistry journal article supplement (doi:10.1039/d1ta08502f), 2022-01-01
Supplement: d1ta08502f1.zip [file 5-membered-rings.xlsx]

## Sheet: total energies
name (full optimization)	resting state intermediate (a.u.)	bare flake without Fe (a.u.)	oxo intermediate (a.u.)	hydroxyl intermediate (a.u.)	methanol intermediate (a.u.)		naming scheme																										E(resting state) + E(methanol) + E(N2)	E(methanol release) a.u.	E(methanol release) kcal/mol
Fe_N_C	-1874.84	-1751.15	-1949.93	-1950.62	-1990.47		metal_coordinating atom_C																												#REF!
Fe_O_C	-1955.87	-1832.43	-2030.94	-2031.65	-2071.56		C stands for graphene																										#REF!	#REF!	#REF!
Fe_P_C	-3020.75	-2897.23	-3095.86	-3096.52	-3136.37																												#REF!	#REF!	#REF!
Fe_S_C	-3247.45	-3123.96	-3322.5	-3323.19	-3363.11																												#REF!	#REF!	#REF!
																																	#REF!	#REF!
name (fixed z-axis)	resting state intermediate (a.u.)	bare flake without Fe (a.u.)	oxo intermediate (a.u.)	hydroxyl intermediate (a.u.)	methanol intermediate (a.u.)																												E(resting state) + E(methanol) + E(N2)	E(methanol release) a.u.	E(methanol release) kcal/mol
Fe_N_C	-1874.84	-1751.15	-1949.91	-1950.61	-1990.47
Fe_O_C	-1955.87	-1832.43	-2030.93	-2031.64	-2071.56																												#REF!	#REF!	#REF!
Fe_P_C	-3020.64	-2897.16	-3095.67	-3096.36	-3136.28																												#REF!	#REF!	#REF!
Fe_S_C	-3247.29	-3123.82	-3322.32	-3323.03	-3362.94																												#REF!	#REF!	#REF!
																																	#REF!	#REF!	#REF!
energies are for wPBEh with LACVP*
																																			E(resting state) + E(methane)+ E(N2O)		E(oxo intermediate) + E(methane) + E(N2)			E(hydroxyl intermediate) + E(methyl radical) + E(N2)			E(methanaol intermediate) + E(N2)			E(resting state) + E(methanol) + E(N2)
																																			-1721.97		-1797.07	-75.0921	-47121	-1797.75	-75.7811	-47553.4	-1837.64	-115.666	-72581.6	-1721.97	0	0
																																			-1803.48		-1878.58	-75.0968	-47124	-1879.28	-75.7994	-47564.9	-1919.15	-115.675	-72587.2	-1803.48	0	0
																																			-2867.8		-2942.89	-75.0902	-47119.9	-2943.54	-75.7381	-47526.4	-2983.44	-115.643	-72567.1	-2867.8	-7.99901e-10	-5.01946e-07
																																			-3095.06		-3170.13	-75.0729	-47109	-3170.81	-75.7564	-47537.9	-3210.73	-115.671	-72584.4	-3095.06	0	0
																																			-1874.84		-1949.93	-75.0903	-47119.9	-1950.62	-75.7739	-47548.9	-1990.47	-115.628	-72557.8	-1874.84	-4.99995e-10	-3.13752e-07
																																			-1955.87		-2030.94	-75.0734	-47109.3	-2031.65	-75.7744	-47549.2	-2071.56	-115.694	-72599.1	-1955.87	0	0
																																			-3020.75		-3095.86	-75.1037	-47128.3	-3096.52	-75.7651	-47543.3	-3136.37	-115.623	-72554.7	-3020.75	0	0
																																			-3247.45		-3322.5	-75.0513	-47095.5	-3323.19	-75.7446	-47530.5	-3363.11	-115.656	-72575.4	-3247.45	0	0
																																			E(resting state) + E(methane)+ E(N2O)		E(oxo intermediate) + E(methane) + E(N2)			E(hydroxyl intermediate) + E(methyl radical) + E(N2)			E(methanaol intermediate) + E(N2)			E(resting state) + E(methanol) + E(N2)
																																			-1721.97		-1797.04	-75.0693	-47106.7	-1797.75	-75.7726	-47548.1	-1837.64	-115.663	-72579.8	-1721.97	0	0
																																			-1803.48		-1878.56	-75.0821	-47114.8	-1879.27	-75.7883	-47557.9	-1919.15	-115.669	-72583.3	-1803.48	0	0
																																			-2867.68		-2942.75	-75.0782	-47112.3	-2943.41	-75.7324	-47522.8	-2983.34	-115.663	-72580	-2867.68	0	0
																																			-3094.95		-3169.95	-75.0053	-47066.6	-3170.64	-75.6979	-47501.2	-3210.56	-115.615	-72549.3	-3094.95	0	0
																																			-1874.84		-1949.91	-75.0663	-47104.9	-1950.61	-75.7613	-47541	-1990.47	-115.625	-72556	-1874.84	0	0
																																			-1955.87		-2030.93	-75.0612	-47101.7	-2031.64	-75.7695	-47546.1	-2071.56	-115.691	-72597.4	-1955.87	0	0
																																			-3020.64		-3095.67	-75.0344	-47084.9	-3096.36	-75.7248	-47518.1	-3136.28	-115.645	-72568.5	-3020.64	0	0
																																			-3247.29		-3322.32	-75.0227	-47077.5	-3323.03	-75.7358	-47525	-3362.94	-115.646	-72569.2	-3247.29	0	0

## Sheet: bond lengths
5-membered-rings (full optimization)	Fe-dopant1 (Å)	Fe-dopant2 (Å)	Fe-dopant3(Å)	Fe-dopant4 (Å)	average (Å)		M=O bond length in oxo intermediate (Å)	M-OH bond length in hydroxyl intermediate (Å)	M-O bond length in methanol intermediate (Å)
Fe_N_C	1.97698	1.977	1.97701	1.977	1.977		1.59622	1.76232	2.02122
Fe_O_C	1.99087	1.99127	1.99149	1.99092	1.99114		1.59437	1.70494	1.91362
Fe_P_C	2.19841	2.19836	2.19839	2.19834	2.19837		1.61704	1.85249	2.06611
Fe_S_C	2.22318	2.22316	2.22306	2.22295	2.22309		1.59032	1.73658	2.01305
5-membered-rings (fixed z-axis)	Fe-dopant1 (Å)	Fe-dopant2 (Å)	Fe-dopant3 (Å)	Fe-dopant4 (Å)			M=O bond length in oxo intermediate (Å)	M-OH bond length in hydroxyl intermediate (Å)	M-O bond length in methanol intermediate (Å)
Fe_N_C	1.97645	1.97723	1.97691	1.97755			1.59593	1.77918	2.02327
Fe_O_C	1.99076	1.99133	1.99163	1.99086			1.61053	1.70748	1.92765
Fe_P_C	1.95728	1.958	1.95874	1.9585			1.65311	1.93315	2.11265
Fe_S_C	1.97414	1.9741	1.97418	1.97407			1.65655	1.89664	1.99976

## Sheet: formation energy
5-membered-rings (full optimization)	E_formation (a.u.)	E_formation (eV)
Fe_N_C	-1.39955	-38.0831
Fe_O_C	-1.14596	-31.1827
Fe_P_C	-1.23294	-33.5495
Fe_S_C	-1.19934	-32.6354
5-membered-rings (fixed z-axis)	E_formation (a.u.)	E_formation (eV)
Fe_N_C	-1.39992	-38.0931
Fe_O_C	-1.14618	-31.1887
Fe_P_C	-1.18255	-32.1783
Fe_S_C	-1.17742	-32.0387

## Sheet: reaction energy
5-membered-rings (full optimization)	ΔE(oxo) (a.u.)	ΔE(oxo) (kcal/mol)	ΔE(HAT) (a.u.)	ΔE(HAT) (kcal/mol)	ΔE(rebound) (a.u.)	ΔE(rebound) (kcal/mol)	ΔE(release) (a.u.)	ΔE(release) (kcal/mol)
Fe_N_C	-0.020237	-12.6989	-0.00545297	-3.42179	-0.0633688	-39.7646	0.0303165	19.0239
Fe_O_C	-0.00338367	-2.12329	-0.0228171	-14.3179	-0.128784	-80.8132	0.0962424	60.3931
Fe_P_C	-0.0336393	-21.109	0.0167934	10.538	-0.0673484	-42.2618	0.025452	15.9714
Fe_S_C	0.0187248	11.75	-0.0151151	-9.4849	-0.120846	-75.8322	0.0584943	36.7057
5-membered-rings (fixed z-axis)	ΔE(oxo) (a.u.)	ΔE(oxo) (kcal/mol)	ΔE(HAT) (a.u.)	ΔE(HAT) (kcal/mol)	ΔE(rebound) (a.u.)	ΔE(rebound) (kcal/mol)	ΔE(release) (a.u.)	ΔE(release) (kcal/mol)
Fe_N_C	0.00374273	2.3486	-0.0167822	-10.531	-0.0731389	-45.8954	0.0274361	17.2164
Fe_O_C	0.00881842	5.53365	-0.0300838	-18.8779	-0.130895	-82.1381	0.0934183	58.6209
Fe_P_C	0.0356186	22.351	-0.0121897	-7.64915	-0.129562	-81.3012	0.0473904	29.7379
Fe_S_C	0.047343	29.7082	-0.0349241	-21.9152	-0.119645	-75.0785	0.048484	30.4242

## Sheet: reaction progress
5-membered-rings (full optimization)	E(resting state) + E(methane)+ E(N2O) (a.u.)	E(oxo intermediate) + E(methane) + E(N2) (a.u.)	E(hydroxyl intermediate) + E(methyl radical) + E(N2) (a.u.)	E(methanol intermediate) + E(N2) (a.u.)	E(resting state) + E(methanol) + E(N2) (a.u.)
Fe_N_C	-2099.8	-2099.82	-2099.82	-2099.89	-2099.86
Fe_O_C	-2180.82	-2180.83	-2180.85	-2180.98	-2180.88
Fe_P_C	-3245.7	-3245.74	-3245.72	-3245.79	-3245.76
Fe_S_C	-3472.4	-3472.38	-3472.4	-3472.52	-3472.46
5-membered-rings (fixed z-axis)	E(resting state) + E(methane)+ E(N2O) (a.u.)	E(oxo intermediate) + E(methane) + E(N2) (a.u.)	E(hydroxyl intermediate) + E(methyl radical) + E(N2) (a.u.)	E(methanol intermediate) + E(N2) (a.u.)	E(resting state) + E(methanol) + E(N2) (a.u.)
Fe_N_C	-2099.8	-2099.79	-2099.81	-2099.88	-2099.86
Fe_O_C	-2180.82	-2180.81	-2180.84	-2180.98	-2180.88
Fe_P_C	-3245.59	-3245.55	-3245.56	-3245.69	-3245.65
Fe_S_C	-3472.25	-3472.2	-3472.23	-3472.35	-3472.31
