# Supplementary material for: Modeling the roles of rigidity and dopants in single-atom methane-to-methanol catalysts
Source: Royal Society of Chemistry journal article supplement (doi:10.1039/d1ta08502f), 2022-01-01
Supplement: d1ta08502f1.zip [file 6-membered-rings.xlsx]

## Sheet: total energies
name (full optimization)	resting state intermediate (a.u.)	bare flake without Fe (a.u.)	oxo intermediate (a.u.)	hydroxyl intermediate (a.u.)	methanol intermediate (a.u.)		naming scheme																										E(resting state) + E(methanol) + E(N2)	E(methanol release) a.u.	E(methanol release) kcal/mol
Fe_N_C	-1721.97	-1598.31	-1797.07	-1797.75	-1837.64		metal_coordinating atom_C																												#REF!
Fe_O_C	-1803.48	-1680.13	-1878.58	-1879.28	-1919.15		C stands for graphene																										#REF!	#REF!	#REF!
Fe_P_C	-2867.8	-2744.27	-2942.9	-2943.55	-2983.44																												#REF!	#REF!	#REF!
Fe_S_C	-3095.06	-2971.61	-3170.13	-3170.81	-3210.73																												#REF!	#REF!	#REF!
																																	#REF!	#REF!
name (fixed z-axis)	resting state intermediate (a.u.)	bare flake without Fe (a.u.)	oxo intermediate (a.u.)	hydroxyl intermediate (a.u.)	methanol intermediate (a.u.)																												E(resting state) + E(methanol) + E(N2)	E(methanol release) a.u.	E(methanol release) kcal/mol
Fe_N_C	-1721.97	-1598.3	-1797.04	-1797.75	-1837.64
Fe_O_C	-1803.48	-1680.13	-1878.56	-1879.27	-1919.15																												#REF!	#REF!	#REF!
Fe_P_C	-2867.68	-2744.2	-2942.75	-2943.41	-2983.34																												#REF!	#REF!	#REF!
Fe_S_C	-3094.95	-2971.56	-3169.95	-3170.64	-3210.56																												#REF!	#REF!	#REF!
																																	#REF!	#REF!	#REF!
energies are for wPBEh with LACVP*
																																			E(resting state) + E(methane)+ E(N2O)		E(oxo intermediate) + E(methane) + E(N2)			E(hydroxyl intermediate) + E(methyl radical) + E(N2)			E(methanaol intermediate) + E(N2)			E(resting state) + E(methanol) + E(N2)
																																			-1721.97		-1797.07	-75.0921	-47121	-1797.75	-75.7811	-47553.4	-1837.64	-115.666	-72581.6	-1721.97	0	0
																																			-1803.48		-1878.58	-75.0968	-47124	-1879.28	-75.7994	-47564.9	-1919.15	-115.675	-72587.2	-1803.48	0	0
																																			-2867.8		-2942.89	-75.0902	-47119.9	-2943.54	-75.7381	-47526.4	-2983.44	-115.643	-72567.1	-2867.8	-7.99901e-10	-5.01946e-07
																																			-3095.06		-3170.13	-75.0729	-47109	-3170.81	-75.7564	-47537.9	-3210.73	-115.671	-72584.4	-3095.06	0	0
																																			-1874.84		-1949.93	-75.0903	-47119.9	-1950.62	-75.7739	-47548.9	-1990.47	-115.628	-72557.8	-1874.84	-4.99995e-10	-3.13752e-07
																																			-1955.87		-2030.94	-75.0734	-47109.3	-2031.65	-75.7744	-47549.2	-2071.56	-115.694	-72599.1	-1955.87	0	0
																																			-3020.75		-3095.86	-75.1037	-47128.3	-3096.52	-75.7651	-47543.3	-3136.37	-115.623	-72554.7	-3020.75	0	0
																																			-3247.45		-3322.5	-75.0513	-47095.5	-3323.19	-75.7446	-47530.5	-3363.11	-115.656	-72575.4	-3247.45	0	0
																																			E(resting state) + E(methane)+ E(N2O)		E(oxo intermediate) + E(methane) + E(N2)			E(hydroxyl intermediate) + E(methyl radical) + E(N2)			E(methanaol intermediate) + E(N2)			E(resting state) + E(methanol) + E(N2)
																																			-1721.97		-1797.04	-75.0693	-47106.7	-1797.75	-75.7726	-47548.1	-1837.64	-115.663	-72579.8	-1721.97	0	0
																																			-1803.48		-1878.56	-75.0821	-47114.8	-1879.27	-75.7883	-47557.9	-1919.15	-115.669	-72583.3	-1803.48	0	0
																																			-2867.68		-2942.75	-75.0782	-47112.3	-2943.41	-75.7324	-47522.8	-2983.34	-115.663	-72580	-2867.68	0	0
																																			-3094.95		-3169.95	-75.0053	-47066.6	-3170.64	-75.6979	-47501.2	-3210.56	-115.615	-72549.3	-3094.95	0	0
																																			-1874.84		-1949.91	-75.0663	-47104.9	-1950.61	-75.7613	-47541	-1990.47	-115.625	-72556	-1874.84	0	0
																																			-1955.87		-2030.93	-75.0612	-47101.7	-2031.64	-75.7695	-47546.1	-2071.56	-115.691	-72597.4	-1955.87	0	0
																																			-3020.64		-3095.67	-75.0344	-47084.9	-3096.36	-75.7248	-47518.1	-3136.28	-115.645	-72568.5	-3020.64	0	0
																																			-3247.29		-3322.32	-75.0227	-47077.5	-3323.03	-75.7358	-47525	-3362.94	-115.646	-72569.2	-3247.29	0	0

## Sheet: bond lengths
Fe-dopant1 (Å)	Fe-dopant2 (Å)	Fe-dopant3(Å)	Fe-dopant4 (Å)	average (Å)		M=O bond length in oxo intermediate (Å)	M-OH bond length in hydroxyl intermediate (Å)	M-O bond length in methanol intermediate (Å)
1.92079	1.92056	1.92064	1.92073	1.92068		1.59622	1.58594	1.98938
1.89852	1.89837	1.89835	1.89858	1.89846		1.59437	1.64081	1.94083
2.15539	2.15505	2.15636	2.15627	2.15577		1.61704	1.61178	2.06651
2.21707	2.21703	2.21719	2.21712	2.2171		1.59032	1.59639	1.98702
Fe_S_C
6-membered-rings (fixed z-axis)	Fe-dopant1 (Å)	Fe-dopant2 (Å)	Fe-dopant3 (Å)	Fe-dopant4 (Å)		M=O bond length in oxo intermediate (Å)	M-OH bond length in hydroxyl intermediate (Å)	M-O bond length in methanol intermediate (Å)
Fe_N_C	1.92079	1.92056	1.92064	1.92073		1.59593	1.59298	2.00308
Fe_O_C	1.89854	1.89838	1.89837	1.89856		1.61053	1.65659	1.94526
Fe_P_C	2.01886	2.01868	2.0187	2.01883		1.65311	1.63357	2.07551
Fe_S_C	1.94771	1.94771	1.94771	1.94771		1.65655	1.86463	3.11697

## Sheet: formation energy 
6-membered-rings (full optimization)	E_formation (a.u.)	E_formation (eV)
Fe_N_C	-1.3737	-37.3798
Fe_O_C	-1.05141	-28.61
Fe_P_C	-1.23627	-33.6402
Fe_S_C	-1.15348	-31.3874
6-membered-rings (fixed z-axis)	E_formation (a.u.)	E_formation (eV)
Fe_N_C	-1.38118	-37.5832
Fe_O_C	-1.05654	-28.7495
Fe_P_C	-1.17975	-32.1021
Fe_S_C	-1.09684	-29.846

## Sheet: reaction energy
6-membered-rings (full optimization)	ΔE(oxo) (a.u.)	ΔE(oxo) (kcal/mol)	ΔE(HAT) (a.u.)	ΔE(HAT) (kcal/mol)	ΔE(rebound) (a.u.)	ΔE(rebound) (kcal/mol)	ΔE(release) (a.u.)	ΔE(release) (kcal/mol)
Fe_N_C	-0.0220401	-13.8304	-0.0108313	-6.79673	-0.0941073	-59.0533	0.0682364	42.819
Fe_O_C	-0.0267541	-16.7885	-0.0243752	-15.2957	-0.0848535	-53.2464	0.0772404	48.4691
Fe_P_C	-0.0271498	-17.0368	0.027272	17.1135	-0.104129	-65.3417	0.0452641	28.4037
Fe_S_C	-0.00284278	-1.78387	-0.00529705	-3.32395	-0.123369	-77.4156	0.072767	45.662
6-membered-rings (fixed z-axis)	ΔE(oxo) (a.u.)	ΔE(oxo) (kcal/mol)	ΔE(HAT) (a.u.)	ΔE(HAT) (kcal/mol)	ΔE(rebound) (a.u.)	ΔE(rebound) (kcal/mol)	ΔE(release) (a.u.)	ΔE(release) (kcal/mol)
Fe_N_C	0.000777069	0.487619	-0.0251563	-15.7858	-0.0998429	-62.6524	0.0654798	41.0893
Fe_O_C	-0.0120652	-7.57105	-0.0280384	-17.5944	-0.0895694	-56.2057	0.0709308	44.5098
Fe_P_C	-0.00818979	-5.13917	0.0240779	15.1091	-0.140383	-88.0916	0.0657524	41.2603
Fe_S_C	0.064726	40.6162	-0.0143453	-9.00182	-0.125909	-79.0089	0.0167856	10.5331

## Sheet: reaction progress
6-membered-rings (full optimization)	E(resting state) + E(methane)+ E(N2O) (a.u.)	E(oxo intermediate) + E(methane) + E(N2) (a.u.)	E(hydroxyl intermediate) + E(methyl radical) + E(N2) (a.u.)	E(methanol intermediate) + E(N2) (a.u.)	E(resting state) + E(methanol) + E(N2) (a.u.)
Fe_N_C	-1946.93	-1946.95	-1946.96	-1947.05	-1946.99
Fe_O_C	-2028.43	-2028.46	-2028.48	-2028.57	-2028.49
Fe_P_C	-3092.75	-3092.77	-3092.74	-3092.86	-3092.81
Fe_S_C	-3320.01	-3320.01	-3320.02	-3320.14	-3320.07
6-membered-rings (fixed z-axis)	E(resting state) + E(methane)+ E(N2O) (a.u.)	E(oxo intermediate) + E(methane) + E(N2) (a.u.)	E(hydroxyl intermediate) + E(methyl radical) + E(N2) (a.u.)	E(methanol intermediate) + E(N2) (a.u.)	E(resting state) + E(methanol) + E(N2) (a.u.)
Fe_N_C	-1946.93	-1946.93	-1946.95	-1947.05	-1946.99
Fe_O_C	-2028.43	-2028.44	-2028.47	-2028.56	-2028.49
Fe_P_C	-3092.63	-3092.64	-3092.61	-3092.75	-3092.69
Fe_S_C	-3319.9	-3319.84	-3319.85	-3319.98	-3319.96
