# Supplementary material for: Modeling the roles of rigidity and dopants in single-atom methane-to-methanol catalysts
Source: Royal Society of Chemistry journal article supplement (doi:10.1039/d1ta08502f), 2022-01-01
Supplement: d1ta08502f1.zip [file increasing_large_6_membered_ring.xlsx]

## Sheet: total energies and bond lengths
name	total energy (a.u.)	Fe-dopant1 (Å)	Fe-dopant2 (Å)	Fe-dopant3 (Å)	Fe-dopant4 (Å)																												E(resting state) + E(methanol) + E(N2)	E(methanol release) a.u.	E(methanol release) kcal/mol
C36N4H16Fe	-1721.97	1.92091	1.92091	1.92054	1.92047																														#REF!
C74N4H22Fe	-3172.49	1.90652	1.88924	1.90322	1.90924																												#REF!	#REF!	#REF!
C124N4H28Fe	-5080.07	1.91241	1.9121	1.91206	1.91239																												#REF!	#REF!	#REF!
C186N4H34Fe	-7444.51	1.90733	1.91358	1.90555	1.91636																												#REF!	#REF!	#REF!
C260N4H40Fe	-10266	1.88434	1.88214	1.88215	1.88446																												#REF!	#REF!
C346N4H46Fe	-13544.3	1.87467	1.8787	1.87312	1.88151
C36O4H16Fe	-1803.48	1.89861	1.89908	1.8983	1.89788																												E(resting state) + E(methanol) + E(N2)	E(methanol release) a.u.	E(methanol release) kcal/mol
C74O4H22Fe	-3254.05	1.90526	1.90431	1.9053	1.90403
C124O4H28Fe	-5161.57	1.89686	1.89705	1.89694	1.89685																												#REF!	#REF!	#REF!
C186O4H34Fe	-7526.05	1.90038	1.90247	1.90255	1.90032																												#REF!	#REF!	#REF!
C260O4H40Fe	-10347.5	1.89357	1.8955	1.89505	1.89301																												#REF!	#REF!	#REF!
C346O4H46Fe	-13625.9	1.90056	1.90369	1.9032	1.90014																												#REF!	#REF!	#REF!
C36P4H16Fe	-2867.8	2.15539	2.15505	2.15636	2.15627
C74P4H22Fe	-4318.39	2.0707	2.07079	2.07018	2.07024
C124P4H28Fe	-6225.93	2.07308	2.07344	2.0732	2.07289
C186P4H34Fe	-8590.38	2.07679	2.0776	2.07727	2.07676
C260P4H40Fe	-11411.9	2.06521	2.06479	2.06456	2.0648
C346P4H46Fe	-14690.2	2.06118	2.06017	2.05989	2.06086
C36S4H16Fe	-3095.06	2.21707	2.21703	2.21719	2.21712
C74S4H22Fe	-4545.62	2.10554	2.10532	2.10521	2.10485
C124S4H28Fe	-6453.14	2.1192	2.11865	2.11965	2.11845
C186S4H34Fe	-8817.61	2.09728	2.09533	2.09981	2.10142
C260S4H40Fe	-11639	2.10508	2.10859	2.10846	2.105
C346S4H46Fe	-14917.4	2.10266	2.09808	2.09729	2.10182
energies are for wPBEh with LACVP*
																																			E(resting state) + E(methane)+ E(N2O)		E(oxo intermediate) + E(methane) + E(N2)			E(hydroxyl intermediate) + E(methyl radical) + E(N2)			E(methanaol intermediate) + E(N2)			E(resting state) + E(methanol) + E(N2)
																																			-1721.97		-1797.07	-75.0921	-47121	-1797.75	-75.7811	-47553.4	-1837.64	-115.666	-72581.6	-1721.97	0	0
																																			-1803.48		-1878.58	-75.0968	-47124	-1879.28	-75.7994	-47564.9	-1919.15	-115.675	-72587.2	-1803.48	0	0
																																			-2867.8		-2942.89	-75.0902	-47119.9	-2943.54	-75.7381	-47526.4	-2983.44	-115.643	-72567.1	-2867.8	-7.99901e-10	-5.01946e-07
																																			-3095.06		-3170.13	-75.0729	-47109	-3170.81	-75.7564	-47537.9	-3210.73	-115.671	-72584.4	-3095.06	0	0
																																			-1874.84		-1949.93	-75.0903	-47119.9	-1950.62	-75.7739	-47548.9	-1990.47	-115.628	-72557.8	-1874.84	-4.99995e-10	-3.13752e-07
																																			-1955.87		-2030.94	-75.0734	-47109.3	-2031.65	-75.7744	-47549.2	-2071.56	-115.694	-72599.1	-1955.87	0	0
																																			-3020.75		-3095.86	-75.1037	-47128.3	-3096.52	-75.7651	-47543.3	-3136.37	-115.623	-72554.7	-3020.75	0	0
																																			-3247.45		-3322.5	-75.0513	-47095.5	-3323.19	-75.7446	-47530.5	-3363.11	-115.656	-72575.4	-3247.45	0	0
																																			E(resting state) + E(methane)+ E(N2O)		E(oxo intermediate) + E(methane) + E(N2)			E(hydroxyl intermediate) + E(methyl radical) + E(N2)			E(methanaol intermediate) + E(N2)			E(resting state) + E(methanol) + E(N2)
																																			-1721.97		-1797.04	-75.0693	-47106.7	-1797.75	-75.7726	-47548.1	-1837.64	-115.663	-72579.8	-1721.97	0	0
																																			-1803.48		-1878.56	-75.0821	-47114.8	-1879.27	-75.7883	-47557.9	-1919.15	-115.669	-72583.3	-1803.48	0	0
																																			-2867.68		-2942.75	-75.0782	-47112.3	-2943.41	-75.7324	-47522.8	-2983.34	-115.663	-72580	-2867.68	0	0
																																			-3094.95		-3169.95	-75.0053	-47066.6	-3170.64	-75.6979	-47501.2	-3210.56	-115.615	-72549.3	-3094.95	0	0
																																			-1874.84		-1949.91	-75.0663	-47104.9	-1950.61	-75.7613	-47541	-1990.47	-115.625	-72556	-1874.84	0	0
																																			-1955.87		-2030.93	-75.0612	-47101.7	-2031.64	-75.7695	-47546.1	-2071.56	-115.691	-72597.4	-1955.87	0	0
																																			-3020.64		-3095.67	-75.0344	-47084.9	-3096.36	-75.7248	-47518.1	-3136.28	-115.645	-72568.5	-3020.64	0	0
																																			-3247.29		-3322.32	-75.0227	-47077.5	-3323.03	-75.7358	-47525	-3362.94	-115.646	-72569.2	-3247.29	0	0

## Sheet: formation energy 
name	E_formation (a.u.)	E_formation (eV)
C36N4H16Fe	-1.38118	-37.5833
C74N4H22Fe	-1.26272	-34.36
C124N4H28Fe	-1.30378	-35.4771
C186N4H34Fe	-1.25205	-34.0696
C260N4H40Fe	-1.27356	-34.6548
C346N4H46Fe	-1.24256	-33.8113
C36O4H16Fe	-1.05655	-28.7498
C74O4H22Fe	-0.997181	-27.1343
C124O4H28Fe	-1.02968	-28.0186
C186O4H34Fe	-0.995044	-27.0761
C260O4H40Fe	-1.02299	-27.8365
C346O4H46Fe	-0.991369	-26.9762
C36P4H16Fe	-1.23627	-33.6402
C74P4H22Fe	-1.22596	-33.3597
C124P4H28Fe	-1.21516	-33.0657
C186P4H34Fe	-1.22616	-33.365
C260P4H40Fe	-1.21571	-33.0806
C346P4H46Fe	-1.19755	-32.5864
C36S4H16Fe	-1.15348	-31.3874
C74S4H22Fe	-1.07171	-29.1623
C124S4H28Fe	-1.10425	-30.0479
C186S4H34Fe	-1.05845	-28.8014
C260S4H40Fe	-1.07679	-29.3004
C346S4H46Fe	-1.05255	-28.6409
