# Supplementary material for: Modeling the roles of rigidity and dopants in single-atom methane-to-methanol catalysts
Source: Royal Society of Chemistry journal article supplement (doi:10.1039/d1ta08502f), 2022-01-01
Supplement: d1ta08502f1.zip [file TMC.xlsx]

## Sheet: Sheet1
name	total energy (a.u.)	Fe-dopant1 (Å)	Fe-dopant2 (Å)	Fe-dopant3 (Å)	Fe-dopant4 (Å)	Fe-dopant5 (Å)	Fe-dopant6 (Å)	average (Å)
fe_2_1_pyridine_pyridine_pyridine_pyridine_pyridine_pyridine	-1611.26	2.10201	2.15006	2.10195	2.15015	2.08231	2.08235	2.11147
fe_2_1_4H-pyran_4H-pyran_4H-pyran_4H-pyran_4H-pyran_4H-pyran	-1737.13	2.07	2.32875	2.28802	2.32097	2.02653	2.02745	2.17695
fe_2_1_phosphinine_phosphinine_phosphinine_phosphinine_phosphinine_phosphinine	-3330.25	2.25685	2.26388	2.25685	2.26385	2.24915	2.24915	2.25662
fe_2_1_4H-thiopyran_4H-thiopyran_4H-thiopyran_4H-thiopyran_4H-thiopyran_4H-thiopyran	-3674.63	2.35085	2.37525	2.42775	2.38765	2.42171	2.34314	2.38439
fe_2_1_pyrrole_pyrrole_pyrrole_pyrrole_pyrrole_pyrrole	-1379.2	2.11433	2.11431	2.1143	2.11435	2.11428	2.11442	2.11433
fe_2_1_furan_furan_furan_furan_furan_furan	-1501.65	2.03001	2.03003	2.03011	2.03011	2.02999	2.02986	2.03002
fe_2_1_phospholide_phospholide_phospholide_phospholide_phospholide_phospholide	-3098.28	2.33816	2.33908	2.33796	2.33845	2.33841	2.33831	2.33839
fe_2_1_thiophene_thiophene_thiophene_thiophene_thiophene_thiophene	-3439.06	2.38378	2.38407	2.38379	2.38391	2.38406	2.38358	2.38386
energies are for wPBEh with LACVP*
																																				E(resting state) + E(methane)+ E(N2O)		E(oxo intermediate) + E(methane) + E(N2)			E(hydroxyl intermediate) + E(methyl radical) + E(N2)			E(methanaol intermediate) + E(N2)			E(resting state) + E(methanol) + E(N2)
																																				-1721.97		-1797.07	-75.0921	-47121	-1797.75	-75.7811	-47553.4	-1837.64	-115.666	-72581.6	-1721.97	0	0
																																				-1803.48		-1878.58	-75.0968	-47124	-1879.28	-75.7994	-47564.9	-1919.15	-115.675	-72587.2	-1803.48	0	0
																																				-2867.8		-2942.89	-75.0902	-47119.9	-2943.54	-75.7381	-47526.4	-2983.44	-115.643	-72567.1	-2867.8	-7.99901e-10	-5.01946e-07
																																				-3095.06		-3170.13	-75.0729	-47109	-3170.81	-75.7564	-47537.9	-3210.73	-115.671	-72584.4	-3095.06	0	0
																																				-1874.84		-1949.93	-75.0903	-47119.9	-1950.62	-75.7739	-47548.9	-1990.47	-115.628	-72557.8	-1874.84	-4.99995e-10	-3.13752e-07
																																				-1955.87		-2030.94	-75.0734	-47109.3	-2031.65	-75.7744	-47549.2	-2071.56	-115.694	-72599.1	-1955.87	0	0
																																				-3020.75		-3095.86	-75.1037	-47128.3	-3096.52	-75.7651	-47543.3	-3136.37	-115.623	-72554.7	-3020.75	0	0
																																				-3247.45		-3322.5	-75.0513	-47095.5	-3323.19	-75.7446	-47530.5	-3363.11	-115.656	-72575.4	-3247.45	0	0
																																				E(resting state) + E(methane)+ E(N2O)		E(oxo intermediate) + E(methane) + E(N2)			E(hydroxyl intermediate) + E(methyl radical) + E(N2)			E(methanaol intermediate) + E(N2)			E(resting state) + E(methanol) + E(N2)
																																				-1721.97		-1797.04	-75.0693	-47106.7	-1797.75	-75.7726	-47548.1	-1837.64	-115.663	-72579.8	-1721.97	0	0
																																				-1803.48		-1878.56	-75.0821	-47114.8	-1879.27	-75.7883	-47557.9	-1919.15	-115.669	-72583.3	-1803.48	0	0
																																				-2867.68		-2942.75	-75.0782	-47112.3	-2943.41	-75.7324	-47522.8	-2983.34	-115.663	-72580	-2867.68	0	0
																																				-3094.95		-3169.95	-75.0053	-47066.6	-3170.64	-75.6979	-47501.2	-3210.56	-115.615	-72549.3	-3094.95	0	0
																																				-1874.84		-1949.91	-75.0663	-47104.9	-1950.61	-75.7613	-47541	-1990.47	-115.625	-72556	-1874.84	0	0
																																				-1955.87		-2030.93	-75.0612	-47101.7	-2031.64	-75.7695	-47546.1	-2071.56	-115.691	-72597.4	-1955.87	0	0
																																				-3020.64		-3095.67	-75.0344	-47084.9	-3096.36	-75.7248	-47518.1	-3136.28	-115.645	-72568.5	-3020.64	0	0
																																				-3247.29		-3322.32	-75.0227	-47077.5	-3323.03	-75.7358	-47525	-3362.94	-115.646	-72569.2	-3247.29	0	0
